# Supplementary material for: Mast Cells in Skin Scarring: A Review of Animal and Human Research
Source: PubMed Central journal article supplement (PMC7561364; doi:10.3389/fimmu.2020.552205), 2020-09-30
Supplement: Table_1.pdf [file Table_1.pdf]

**Supplementary Table 1a: Research studies for the role of mast cells in skin scarring in Animals**

| Author                     | Lesion type                                                  | Sample                                               | Result                                                                                                                                                                                                                                                                                                                                                                                                                                                                                                                                                                                                                                                       |
|----------------------------|--------------------------------------------------------------|------------------------------------------------------|--------------------------------------------------------------------------------------------------------------------------------------------------------------------------------------------------------------------------------------------------------------------------------------------------------------------------------------------------------------------------------------------------------------------------------------------------------------------------------------------------------------------------------------------------------------------------------------------------------------------------------------------------------------|
| <b>Fetal skin scarring</b> |                                                              |                                                      |                                                                                                                                                                                                                                                                                                                                                                                                                                                                                                                                                                                                                                                              |
| Wulff BC et al (2012)      | Embryonic skin and wounds                                    | FVB mice or C57BL/6J-KitW-v/J and WB/Rej KitW/J mice | Dermal mast cells in scarless wounds generated at embryonic day 15 (E15) are fewer in number, less mature, and do not degranulate in response to wounding as effectively as mast cells of fibrotic wounds made at embryonic day 18. Injection of mast cell lysates into E15 wounds disrupted scarless healing, suggesting that mast cells interfere with scarless repair. Scars were significantly smaller in mast cell-deficient Kit(W/W-v) mice compared with Kit(+/-) littermates. This data suggests that mast cells enhance scar formation, and that these cells may mediate the transition from scarless to fibrotic healing during fetal development. |
| <b>Adult skin scarring</b> |                                                              |                                                      |                                                                                                                                                                                                                                                                                                                                                                                                                                                                                                                                                                                                                                                              |
| Lateef Z et al (2019)      | Thermal burns                                                | C57Bl/6 mice                                         | Toluidine blue staining indicated that mast cells disappeared following injury (likely due to degranulation) then increased in number thereafter in scars over 10 weeks post burns.                                                                                                                                                                                                                                                                                                                                                                                                                                                                          |
| Zhu Z et al (2016)         | Human skin transplants and injections of clodronate liposome | 36 Male athymic nude mice                            | Significant reductions in mast cell infiltration were observed in the macrophage depletion with clodronate group compared to the control group.                                                                                                                                                                                                                                                                                                                                                                                                                                                                                                              |
| Chen L et al (2014)        | Normal skin and wounds                                       | Female Balb/c mice                                   | Compared to control, inhibition of mast cell activity, by disodium cromoglycate (DSCG), caused a significant decrease in scar width along with accelerated collagen re-organization. Tryptase $\beta$ 1 increased significantly in the course of wound healing. Blockade of mast cell activation reduces scar formation and inflammation without further weakening the healed wound.                                                                                                                                                                                                                                                                         |

|                         |                                                                        |                                                                            |                                                                                                                                                                                                                                                                                                                                                                   |
|-------------------------|------------------------------------------------------------------------|----------------------------------------------------------------------------|-------------------------------------------------------------------------------------------------------------------------------------------------------------------------------------------------------------------------------------------------------------------------------------------------------------------------------------------------------------------|
| Willenborg et al (2014) | Excisional skin injury                                                 | Genetic mouse model                                                        | The significant reduction of MC numbers does not affect skin wound healing and bleomycin-induced fibrosis in mice.                                                                                                                                                                                                                                                |
| Nauta AC et al (2013)   | Splinted excisional skin wounds                                        | C57BL/6-Kit(W-sh/W-sh), WBB6F1-Kit(W/W-v), and Cpa3-Cre; Mcl-1(fl/fl) mice | Mast cell-deficient mice close excisional wounds at rates similar to those of the corresponding control mice and produce scars similar in size and collagen content compared to control mice. This data indicates that mast cells do not play a significant role in these features of the healing of splinted full thickness excisional cutaneous wounds in mice. |
| Yun IS et al (2012)     | Full-thickness skin defects on the dorsal skin                         | Yorkshire pigs                                                             | Adipose-derived stem cells decrease the activity of mast cells.                                                                                                                                                                                                                                                                                                   |
| Younan et al (2011)     | Full-thickness wound surface microdeformations were induced by suction | Mast cell-deficient WWv mice                                               | Wound tissue granulation, cell proliferation, blood vessel sprouting, and collagen maturation were found to be mast cell-dependent throughout the proliferating and remodeling stages of healing.                                                                                                                                                                 |
| Shiota et al (2010)     | Scald injury                                                           | Mast cell-deficient W/W(V) mice                                            | The number of mast cells and chymase activity were very low in the injured tissues of W/W(V) mice. Wound healing after skin scald injury was partially impaired in mast cell-deficient mice. Mast cells may contribute to the wound healing process, especially in the proliferative and remodeling phases after scald injury.                                    |
|                         |                                                                        |                                                                            |                                                                                                                                                                                                                                                                                                                                                                   |

| <b>Pathological skin scarring</b> |                                                        |                                                    |                                                                                                                                                                                                                                                                                                                    |
|-----------------------------------|--------------------------------------------------------|----------------------------------------------------|--------------------------------------------------------------------------------------------------------------------------------------------------------------------------------------------------------------------------------------------------------------------------------------------------------------------|
| Ibrahim MM et al (2014)           | Hypertrophic scar contracture                          | C57BL/6 mice                                       | Mast cells were increased over 168 days compared to normal skin                                                                                                                                                                                                                                                    |
| Theoret CL et al (2013)           | Equine exuberant granulation tissue and human keloids  | Archival tissue samples of EGT (8) and keloid (12) | Macrophages and mast cells were infrequently found in both groups but polymorphonuclear cells were markedly increased in EGT.                                                                                                                                                                                      |
| Wang J et al (2011)               | Skin grafting onto back of nude mice                   | Nude mice                                          | Human skin grafted onto nude mice develops red raised and thickened scars having intrinsic properties that closely resemble hypertrophic scar formation as seen in humans. Split thickness skin grafting developed more scar than full thickness skin grafting. Grafting increased the infiltration of mast cells. |
| Aarabi et al (2007)               | Hypertrophic scars in mice                             | Mice                                               | Comparisons of murine scars with human scars demonstrated a duplication of all features of human hypertrophic scars including increased mast cell density.                                                                                                                                                         |
| <b>Therapeutic approaches</b>     |                                                        |                                                    |                                                                                                                                                                                                                                                                                                                    |
| Horton et al (2013)               | Radiation-induced fibrosis of skin/scars               | C3H/HeN mice                                       | Imatinib was shown to inhibit radiation-induced dermal fibrosis.                                                                                                                                                                                                                                                   |
| Orenstein et al (2010)            | Synthetic mesh implantation                            | C57BL/6 J mice with and without cromolyn           | Mast cell accumulation was seen at the periphery of inflammatory reactions, and in association with mesh-induced fibrosis and neovascularization. Cromolyn treatment resulted in significantly decreased fibrotic responses to all four meshes and reduced inflammation.                                           |
| Zoog et al (2009)                 | imatinib mesylate applied to incisional wounds in mice | Mice                                               | Imatinib which targets Ckit signalling has been shown to reduce mast cell recruitment in these skin wounds.                                                                                                                                                                                                        |

|                           |                                  |                        |                                                                                                                             |
|---------------------------|----------------------------------|------------------------|-----------------------------------------------------------------------------------------------------------------------------|
| Gallant-Behm et al (2008) | Full-thickness excisional wounds | Yorkshire pigs         | Mast cell stabilizer ketotifen may be an effective treatment for the reduction of excessive wound contraction and fibrosis. |
| Shiota et al (2005)       | Fibrotic skin                    | Tight-skin (Tsk) mice. | A mast cell chymase inhibitor inhibited TGF- $\beta$ 1 activation.                                                          |
|                           |                                  |                        |                                                                                                                             |

**Supplementary Table 1b: Research studies for the role of mast cells in skin scarring in Humans**

| Author                      | Lesion type                                          | Sample                                                                        | Result                                                                                                                                                                                                                                                                                            |
|-----------------------------|------------------------------------------------------|-------------------------------------------------------------------------------|---------------------------------------------------------------------------------------------------------------------------------------------------------------------------------------------------------------------------------------------------------------------------------------------------|
| <b>Fetal skin scarring</b>  |                                                      |                                                                               |                                                                                                                                                                                                                                                                                                   |
| Walraven M et al (2016)     | Second-trimester fetal skin versus adult skin        | Ex vivo human skin samples                                                    | Second-trimester fetal skin contains low levels of immune cells including tryptase positive mast cells compared to adult skin                                                                                                                                                                     |
| Gunin AG et al (2011)       | Skin specimens from human fetuses and adult skin     | Skin samples from foetuses and adult humans                                   | The number of mast cells gradually increased with aging.                                                                                                                                                                                                                                          |
| <b>Adult skin scarring</b>  |                                                      |                                                                               |                                                                                                                                                                                                                                                                                                   |
| Trentin Brum S et al (2019) | Neurofibroma, mastocytosis, fibrous scar tissue      | 15 specimens of neurofibroma, 9 of mastocytosis, and 6 of fibrous scar tissue | Strong endoglin expression was found in the cytoplasmic granules of mast cells within the 3 groups. Similar results were observed with mast cell tryptase as well as toluidine blue. Endoglin may assist in the diagnosis and pathogenesis study of various processes associated with mast cells. |
| Glim JE et al (2015)        | Human skin and oral mucosa, with or without scars    | Ex vivo human skin and oral mucosa samples                                    | No significant differences in mast cells were observed between skin and oral mucosa and both skin and oral mucosa scars contained equal numbers of mast cells when compared to healthy normal tissue.                                                                                             |
| White MJ et al (2015)       | Human blood                                          | In vitro                                                                      | Tryptase and thrombin may be an initial trigger to override SAP inhibition of fibrocyte differentiation to initiate scar tissue formation.                                                                                                                                                        |
| Pistorio AL et al (2011)    | Rodent derived peritoneal mast cell line (RMC-1) and | In vitro                                                                      | Cx-43 participation was shown to be critical for gap junction intercellular communication between mast cells and fibroblasts, which may herald a novel direction for controlling fibrosis.                                                                                                        |

|                                                                         |                                                                                               |                              |                                                                                                                                                                                                                                                                                     |
|-------------------------------------------------------------------------|-----------------------------------------------------------------------------------------------|------------------------------|-------------------------------------------------------------------------------------------------------------------------------------------------------------------------------------------------------------------------------------------------------------------------------------|
|                                                                         | human dermal derived fibroblasts                                                              |                              |                                                                                                                                                                                                                                                                                     |
| <b>Pathological skin scarring (Hypertrophic scars and keloid scars)</b> |                                                                                               |                              |                                                                                                                                                                                                                                                                                     |
| Chen H et al (2017)                                                     | Hypertrophic scars                                                                            | 10 patients                  | Mast cell chymase promotes hypertrophic scar fibroblast proliferation and collagen synthesis by activating the TGF- $\beta$ 1/Smads signalling pathway                                                                                                                              |
| Arbi S et al (2015)                                                     | Keloid scars                                                                                  | Ex vivo human keloid samples | Keloid formation is primarily due to abnormal collagen synthesis where the consequent accumulation of collagen fibers causes increased mast cell recruitment and collagen phagocytosis. Subsequent release of mast cell-derived mediators then promotes further collagen synthesis. |
| Dong X et al (2014)                                                     | Normal skin and keloid fibroblasts                                                            | In vitro                     | Chymase promotes keloid fibroblast proliferation and collagen synthesis by activating TGF- $\beta$ 1. The activation of Smad protein signaling pathway by chymase is related to the elevated P-Smad protein expression in keloid fibroblasts.                                       |
| Hellstrom M et al (2014)                                                | Normal skin, keloids, hypertrophic scars and mature scars                                     | 20 patients                  | The frequency of mast cells found in keloids was lower than in other scar tissues and normal skin.                                                                                                                                                                                  |
| Gaber MA et al (2014)                                                   | Granulation tissues, surgical scars, hypertrophic scars and keloid scars and healthy controls | 50 patients                  | MCCs exhibited mild expression in normal tissue, granulation tissue, and surgical, hypertrophic and keloid scars. MCTs exhibited mild expression in normal tissue, granulation tissue and keloid, whereas moderate expression was exhibited in hypertrophic and surgical scars.     |

|                          |                                                                           |                                                       |                                                                                                                                                                                                                                                                                                                                  |
|--------------------------|---------------------------------------------------------------------------|-------------------------------------------------------|----------------------------------------------------------------------------------------------------------------------------------------------------------------------------------------------------------------------------------------------------------------------------------------------------------------------------------|
| Choi et al (2013)        | Hypertrophic scars and normal skin                                        | 38 patients                                           | Increased number of mast cells present in hypertrophic scars compared to normal skin.                                                                                                                                                                                                                                            |
| Foley TT et al (2013)    | Human dermal fibroblasts                                                  | In vitro                                              | Mast cells induce fibroblast activities associated with hypertrophic scarring through gap junctional intercellular communications. Eliminating the mast cell or its gap junctional intercellular communications with fibroblasts may be a possible approach in preventing hypertrophic scarring or reducing fibrotic conditions. |
| Ammendola M et al (2013) | Keloid scars and normotrophic scars                                       | 15 keloids and 10 normotrophic scars                  | Significant difference of microvascular density and number of mast cells positive to tryptase between keloids and normotrophic scars and a significant correlation in keloids. Tryptase-positive MCs might play a key role in keloids' angiogenesis.                                                                             |
| Theoret CL et al (2013)  | Equine exuberant granulation tissue and human keloids                     | Archival tissue samples of EGT (8) and keloid (12)    | Macrophages and mast cells were infrequently found in both groups but polymorphonuclear cells were markedly increased in EGT.                                                                                                                                                                                                    |
| Bagabir R et al (2012)   | Keloid scars, normal scars and normal skin                                | 25 keloids, 11 normal skin and 11 normal scar samples | Mature MCs (coexpressing OX40 ligand) were significantly increased in intralesional and perilesional KD sites compared with normal skin and scar tissue. This may implicate inflammation in the fibrotic process in KD.                                                                                                          |
| Shaker SA et al (2011)   | Keloid samples and normal skin controls                                   | 44 keloids                                            | High number of mast cells observed in keloid tissues and were found in close contact with fibroblasts.                                                                                                                                                                                                                           |
| Har-Shai Y et al (2011)  | Keloid scars biopsies before and after intralesional cryoneedle procedure | 2 patients                                            | The frozen tissue was devoid of proliferating cells and mast cells. The treatment reduced the number of proliferating cells, myofibroblasts and mast cells.                                                                                                                                                                      |
|                          |                                                                           |                                                       |                                                                                                                                                                                                                                                                                                                                  |

| <b>Therapeutic approaches</b> |                                        |                                    |                                                                                                                                                                                                                                             |
|-------------------------------|----------------------------------------|------------------------------------|---------------------------------------------------------------------------------------------------------------------------------------------------------------------------------------------------------------------------------------------|
| Ud-Din S et al (2019)         | Normal scars                           | 62 healthy volunteers              | Epigallocatechin-3-gallate topical formulation reduced mast cell numbers in normal skin scars between weeks 1-3 of application and this coincided with a reduction in scar thickness and an increase in scar elasticity with EGCG treatment |
| Sidgwick G et al (2016)       | Normal scars and skin                  | Ex vivo skin samples               | Histological analysis indicated a reduction in mast cell tryptase and chymase positive cell numbers in treated biopsies compared with untreated controls at day 7 and day 10.                                                               |
| Syed F et al (2013)           | Keloid tissue and normal skin controls | Ex vivo human samples              | EGCG induced epidermal shrinkage, reduced collagen-I and -III at mRNA and protein levels, depleted 98% of keloid-associated mast cells, and reduced the percentage of both cellularity and blood vessel count by week 4.                    |
| Mukhopadhyay A et al (2011)   | Keloid and normal skin tissue          | Ex vivo human samples and in vitro | SCF/c-KIT system played an important role in scar pathogenesis and Imatinib was identified as a key therapeutic agent for keloid scars.                                                                                                     |
| Zhang et al (2006)            | Keloid fibroblasts                     | In vitro                           | The interaction between mast cells and keloid fibroblasts contribute to excessive collagen accumulation in keloids and implied a therapeutic potential of green tea for the treatment of keloids.                                           |
|                               |                                        |                                    |                                                                                                                                                                                                                                             |
